# Supplementary material for: Biological versus mineralogical chromium reduction: potential for reoxidation by manganese oxide
Source: Royal Society of Chemistry journal article supplement (doi:10.1039/c5em00286a), 2015-01-01
Supplement: c5em00286a1.pdf [file c5em00286a1.pdf]

**Electronic Supplementary Information for**

**Biological versus Mineralogical Chromium Reduction: Potential for Reoxidation by  
Manganese Oxide**

Elizabeth C. Butler<sup>1\*</sup>, Lixia Chen<sup>1,5</sup>, Colleen M. Hansel<sup>2</sup>, Lee. R. Krumholz<sup>3</sup>, Andrew S.  
Madden<sup>4</sup>, Ying Lan<sup>1</sup>

<sup>1</sup>School of Civil Engineering and Environmental Science, University of Oklahoma, Norman, OK  
73019

<sup>2</sup>Department of Marine Chemistry and Geochemistry, Woods Hole Oceanographic Institution,  
Woods Hole, MA 02543

<sup>3</sup>Department of Microbiology and Plant Biology, University of Oklahoma, Norman, OK 73019

<sup>4</sup>School of Geology and Geophysics, University of Oklahoma, Norman, OK 73019

<sup>5</sup>Present address: Oklahoma Department of Environmental Quality, Oklahoma City, OK 73102

September 30, 2015

\*Corresponding author: phone: +1 405-325-3606; Fax: +1 405-325-4217; E-mail:

ecbutler@ou.edu

Table ESI-1. Concentrations and proportions of Fe, Cr, and Mn used in Cr(VI) reduction and birnessite oxidation experiments.

| Microcosm Conditions                  | Cr(VI) Reduction Experiments          |                               |                                                                          |                                       | Birnessite Oxidation Experiments     |                                                        |                                  |                                                                 |                                                  |
|---------------------------------------|---------------------------------------|-------------------------------|--------------------------------------------------------------------------|---------------------------------------|--------------------------------------|--------------------------------------------------------|----------------------------------|-----------------------------------------------------------------|--------------------------------------------------|
|                                       | (A) Conc. of Cr(VI) ( $\mu\text{M}$ ) | (B) Conc. of Fe mineral (g/L) | (C) Max possible conc. of Cr in Fe-Cr solid ( $\mu\text{mol/g}$ ) (=A/B) | (D) Molar ratio of Fe:Cr <sup>d</sup> | (E) Conc. of Fe-Cr solid added (g/L) | (F) Max. possible conc. of Cr ( $\mu\text{M}$ ) (=CxE) | (G) Conc. birnessite added (g/L) | (H) Conc. of Mn (as birnessite <sup>e</sup> ) ( $\mu\text{M}$ ) | (I) Minimum possible molar ratio of Mn:Cr (=H/F) |
| RCH1/Hematite <sup>a</sup>            | 50                                    | 1.3                           | 38                                                                       | 326                                   | 0.5                                  | 19                                                     | 0.016                            | 184                                                             | 9.6                                              |
| RCH1/Al-goethite <sup>a</sup>         | 50                                    | 1.3                           | 38                                                                       | 301                                   | 0.5                                  | 19                                                     | 0.016                            | 184                                                             | 9.6                                              |
| RCH1/NAu-2 <sup>a</sup>               | 50                                    | 1.3                           | 38                                                                       | 123                                   | 0.5                                  | 19                                                     | 0.016                            | 184                                                             | 9.6                                              |
| RCH1 slow/Hematite <sup>a</sup>       | 50                                    | 1.3                           | 38                                                                       | 326                                   | 0.5                                  | 19                                                     | 0.016                            | 184                                                             | 9.6                                              |
| Dithionite-reduced NAu-2 <sup>b</sup> | 200                                   | 0.8                           | 250                                                                      | 19                                    | 0.8                                  | 200                                                    | 0.165                            | 1898                                                            | 9.5                                              |
| FeS <sup>c</sup>                      | 200                                   | 0.031                         | 6452                                                                     | 2                                     | 0.031                                | 200                                                    | 0.165                            | 1898                                                            | 9.5                                              |

<sup>a</sup>Cr(VI) reduction experiments contained 1.3 g/L of Fe(III) mineral and 50  $\mu\text{M}$  Cr(VI). Birnessite oxidation experiments contained 500 mg/L Fe-Cr solid and 16 mg/L birnessite.

<sup>b</sup>Cr(VI) reduction experiment contained 800 mg/L dithionite reduced NAu-2 and 200  $\mu\text{M}$  Cr(VI). Birnessite oxidation experiments contained 800 mg/L Fe-Cr solid and 165 mg/L birnessite.

<sup>c</sup>Cr(VI) reduction experiments contained 31 mg/L FeS and 200  $\mu\text{M}$  Cr(VI). Birnessite oxidation experiments contained 31 mg/L Fe-Cr precipitate and 165 mg/L birnessite.

<sup>d</sup>The mass fraction of Fe in NAu-2 (37.85% for the <1.5  $\mu\text{M}$  fraction) was taken from Keeling et al. (ref. 52 in the manuscript). Al-goethite was assigned a molecular formula of  $\text{Fe}_{0.91}\text{Al}_{0.09}\text{OOH}$ .

<sup>e</sup>An approximate formula of  $\text{MnO}_2$  for birnessite was assumed.

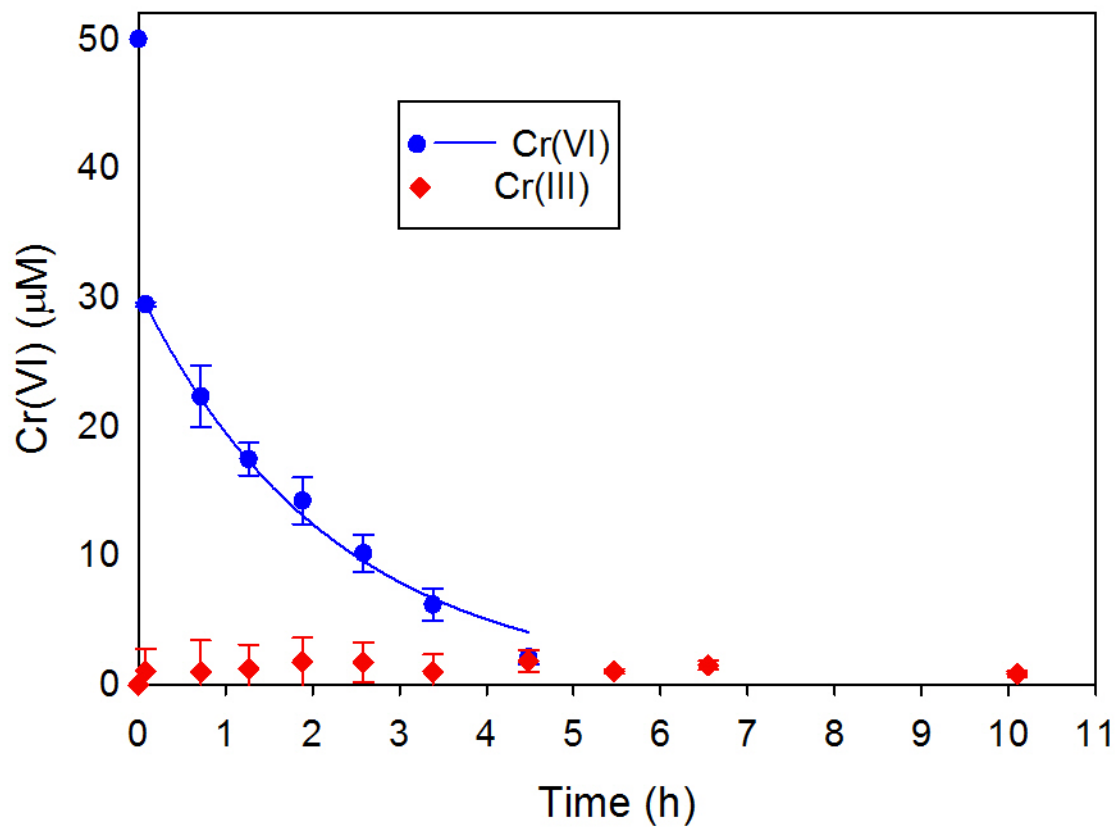

Figure ESI-1. Concentrations of dissolved Cr(VI) and Cr(III) versus time in the RCH1/Al-goethite microcosms. Error bars on symbols are the standard error of mean measurements from duplicate microcosms. The line shows the data fit to a pseudo-first-order rate law.

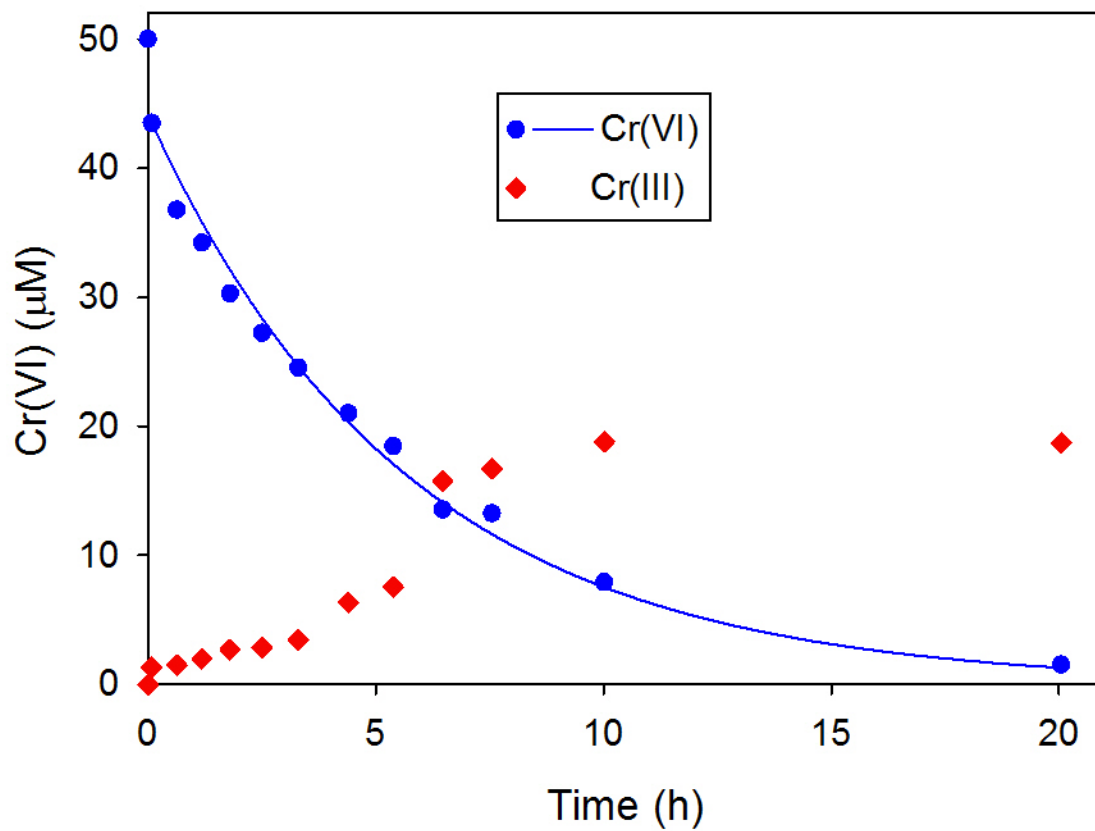

Figure ESI-2. Concentration of dissolved Cr(VI) versus time in the RCH1/NAu-2 microcosm. Results for only one microcosm (no replicates) is shown because there was no Cr(VI) reduction in the second microcosm. Lines show fit of the data to a pseudo first order rate law.

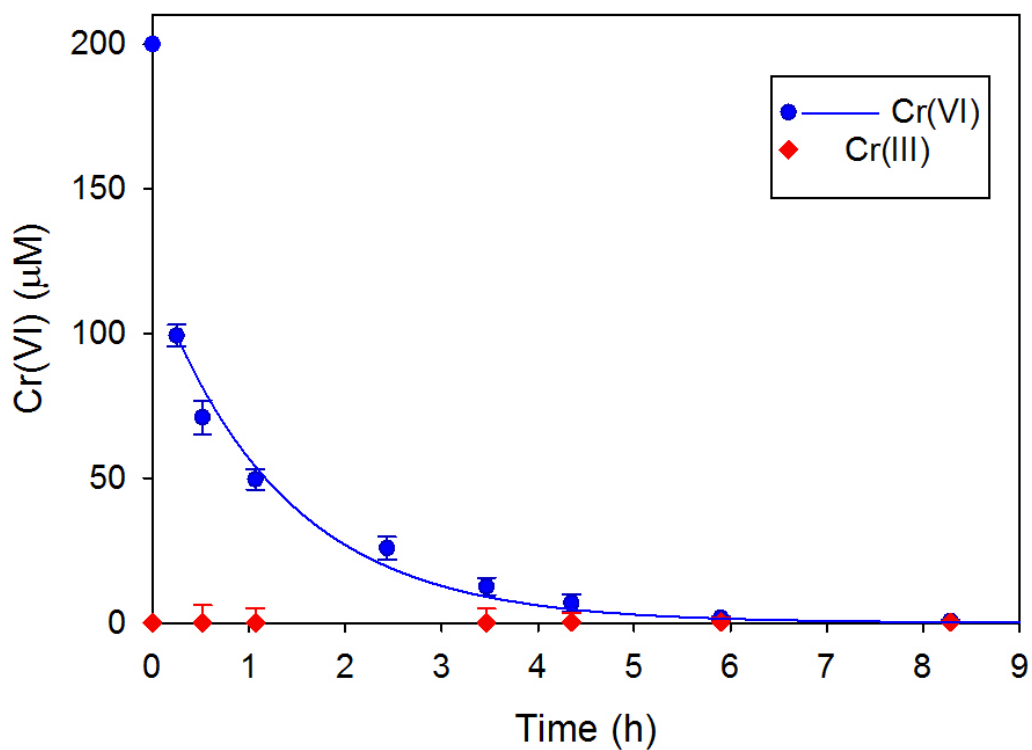

Figure ESI-3. Concentration of dissolved Cr(VI) versus time in the dithionite-reduced N Au-2 microcosm. Error bars on symbols are the standard error of mean measurements from duplicate microcosms. The line shows the data fit to a pseudo-first-order rate law.

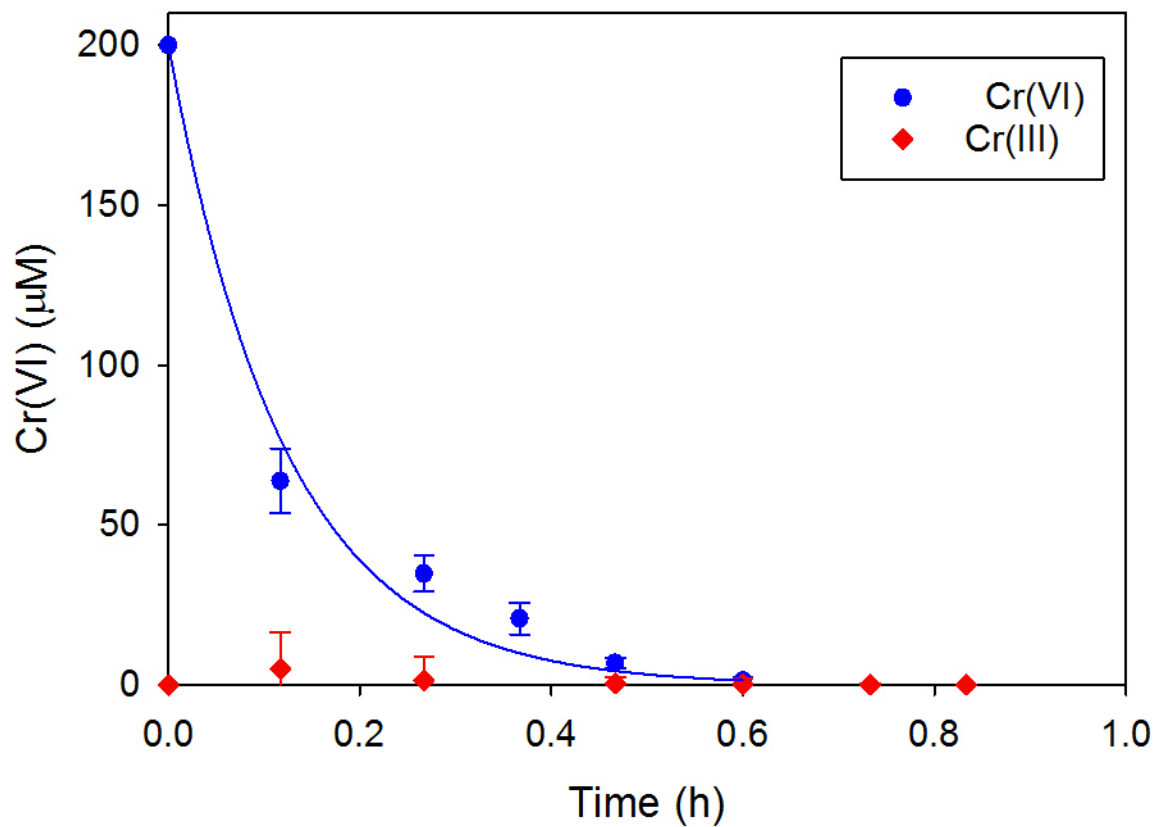

Figure ESI-4. Concentration of dissolved Cr(VI) versus time in the FeS microcosm. Error bars on symbols are the standard error of mean measurements from duplicate microcosms. The line shows the data fit to a pseudo-first-order rate law.

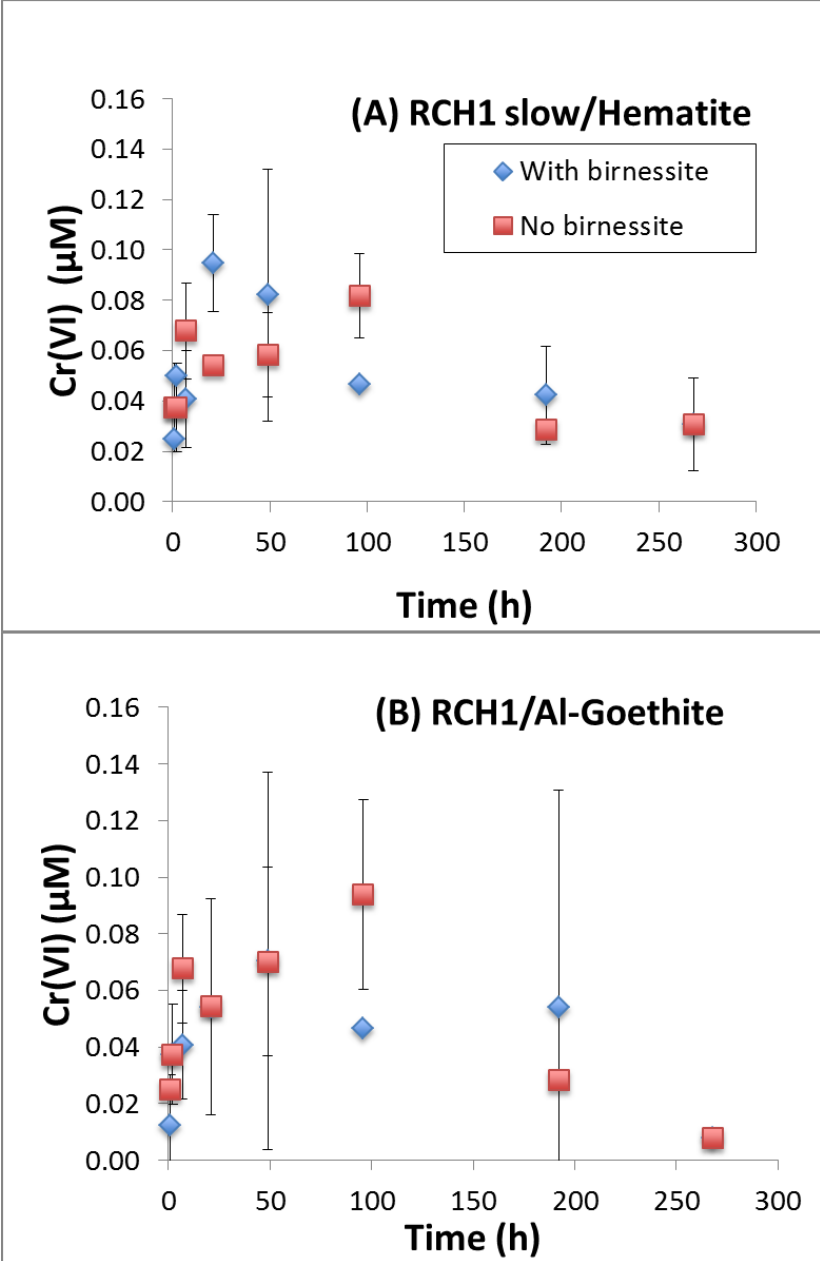

Figure ESI-5. Cr(VI) versus time in precipitates exposed to birnessite.
